# Supplementary material
Source: PubMed Central journal article supplement (PMC10271723)
Supplement: S1368980012004120sup001.pdf [file S1368980012004120sup001.pdf]

Table A: Descriptive results for the family and school environmental factors

| <b>FAMILY ENVIRONMENTAL FACTORS</b>             | Descriptive results          |
|-------------------------------------------------|------------------------------|
| <i>Sociocultural</i>                            |                              |
| Good student according to parent? (1-4)         | 2.8 ± 0.8                    |
| BMI parent                                      | 23.6 ± 3.5 kg/m <sup>2</sup> |
| Single-parent household:                        |                              |
| yes                                             | 4%                           |
| no                                              | 96%                          |
| <hr/>                                           |                              |
| <i>Sociocultural</i>                            |                              |
| <b>Breakfast</b> together (1-5)                 | 4.2 ± 1.3                    |
| <hr/>                                           |                              |
| <i>Physical</i>                                 |                              |
| <b>Soft drink consumption</b> availability:     |                              |
| seldom or never                                 | 11.6%                        |
| sometimes                                       | 28.6%                        |
| (almost) always                                 | 59.4%                        |
| <br>                                            |                              |
| <i>Sociocultural</i>                            |                              |
| <b>Soft drink consumption</b> parents:          |                              |
| never                                           | 24.7%                        |
| <1 day/week or seldom                           | 31.1%                        |
| 1 day/week                                      | 15.1%                        |
| 2-4 days/week                                   | 13.3%                        |
| 5-6 days/week                                   | 3.1%                         |
| every day                                       | 10.1%                        |
| every day, more than once a day                 | 2.5%                         |
| <br>                                            |                              |
| <i>Political</i>                                |                              |
| <b>Soft drink consumption</b> parenting 1 (1-5) | 3.1 ± 1.3                    |
| <b>Soft drink consumption</b> parenting 2 (1-5) | 3.0 ± 1.0                    |
| <b>Soft drink consumption</b> parenting 3 (1-5) | 3.8 ± 1.3                    |
| <hr/>                                           |                              |
| <i>Sociocultural</i>                            |                              |
| <b>Physical activity</b> cycling together       | 35.9 ± 49.4 min/week         |
| <b>Physical activity</b> walking together       | 41.4 ± 53.2 min/week         |
| <b>Physical activity</b> together in car        | 119.3 ± 94.0 min/week        |
| <b>Physical activity</b> attitude (3-9)         | 5.2 ± 1.1                    |
| <b>Physical activity</b> modelling              | 134.4 ± 118.7 min/week       |
| <b>Physical activity</b> together (1-4)         | 1.7 ± 0.7                    |
| <b>Physical activity</b> logistic support (1-4) | 2.8 ± 1.1                    |
| <b>Physical activity</b> encouragement (1-4)    | 2.4 ± 1.0                    |

---

|                                                    |           |
|----------------------------------------------------|-----------|
| <b>Physical activity</b> fitness benefit (1-5)     | 4.3 ± 0.6 |
| <b>Physical activity</b> competition benefit (1-5) | 2.0 ± 0.9 |
| <b>Physical activity</b> social benefit (1-5)      | 4.2 ± 0.8 |
| <b>Physical activity</b> relaxing benefit (1-5)    | 4.2 ± 0.7 |
| <b>Physical activity</b> fun benefit (1-5)         | 4.6 ± 0.5 |
| <b>Physical activity</b> barriers (1-5)            | 2.0 ± 0.7 |

---

### **SCHOOL ENVIRONMENTAL FACTORS**

---

#### *Physical*

Activity in playtime:

|                |       |
|----------------|-------|
| sitting        | 2.8%  |
| standing       | 1.7%  |
| walking around | 13.7% |
| sports         | 81.9% |

Extra-curricular sports (0-6) 2.4 ± 1.2

Participation extra-curricular sports (1-4) 3.1 ± 0.9

#### *Political*

Hours physical education 2.0 ± 0.6 h/week

---

#### *Sociocultural*

Relation with classmates (1-5) 4.1 ± 0.6

Schoolwork stress (1-4) 2.0 ± 0.8

Good student according to teacher? (1-4) 2.8 ± 0.7

#### *Political*

Homework 5.7 ± 4.2 h/week

---

Min, minutes; h, hours

Table B: Single linear regression models for breakfast consumption, soft drink consumption and total physical activity

| DEPENDENT VARIABLES                                    | INDEPENDENT VARIABLES              | $\beta$ | t     | p      |
|--------------------------------------------------------|------------------------------------|---------|-------|--------|
| <b>Breakfast consumption at age 16</b><br>(days/week)  | <b>FAMILY ENVIRONMENT:</b>         |         |       |        |
|                                                        | <i>Sociocultural</i>               |         |       |        |
|                                                        | Good student according to parent?  | 0.09    | 2.40  | 0.02   |
|                                                        | BMI parent                         | -0.10   | -2.75 | 0.01   |
|                                                        | Single-parent household            | -0.08   | -1.93 | ns     |
|                                                        | Having breakfast together          | 0.22    | 6.03  | <0.001 |
|                                                        | <b>SCHOOL ENVIRONMENT:</b>         |         |       |        |
|                                                        | <i>Sociocultural</i>               |         |       |        |
|                                                        | Relation classmates                | -0.06   | -1.50 | ns     |
|                                                        | Schoolwork stress                  | 0.001   | 0.02  | ns     |
|                                                        | Good student according to teacher? | 0.08    | 2.01  | 0.04   |
|                                                        | <i>Political</i>                   |         |       |        |
| Homework                                               | -0.09                              | -2.54   | 0.01  |        |
| <b>Soft drink consumption at age 16</b><br>(days/week) | <b>FAMILY ENVIRONMENT:</b>         |         |       |        |
|                                                        | <i>Physical</i>                    |         |       |        |
|                                                        | Availability soft drinks at home   | 0.33    | 9.44  | <0.001 |
|                                                        | <i>Sociocultural</i>               |         |       |        |
|                                                        | Good student according to parent?  | -0.11   | -2.96 | 0.003  |
|                                                        | BMI parent                         | 0.01    | 0.38  | ns     |
|                                                        | Single-parent household            | 0.07    | 1.66  | ns     |
|                                                        | Soft drink consumption parents     | 0.25    | 7.02  | <0.001 |
|                                                        | <i>Political</i>                   |         |       |        |
|                                                        | Soft drink consumption parenting 1 | -0.16   | -4.18 | <0.001 |
|                                                        | Soft drink consumption parenting 2 | -0.29   | -8.07 | <0.001 |
|                                                        | Soft drink consumption parenting 3 | -0.31   | -8.63 | <0.001 |
|                                                        | <b>SCHOOL ENVIRONMENT:</b>         |         |       |        |
|                                                        | <i>Sociocultural</i>               |         |       |        |
| Relation classmates                                    | 0.07                               | 1.88    | ns    |        |
| Schoolwork stress                                      | 0.03                               | 0.86    | ns    |        |
| Good student according to teacher?                     | -0.10                              | -2.56   | 0.01  |        |
| Homework                                               | 0.02                               | 0.46    | ns    |        |
| <b>Total physical activity at age 16</b>               | <b>FAMILY ENVIRONMENT:</b>         |         |       |        |
|                                                        | <i>Sociocultural</i>               |         |       |        |

|           |                                       |       |       |        |
|-----------|---------------------------------------|-------|-------|--------|
| (min/day) | Good student according to parent?     | -0.05 | -1.46 | ns     |
|           | BMI parent                            | 0.002 | 0.05  | ns     |
|           | Single-parent household               | -0.03 | -0.70 | ns     |
|           | Physical activity cycling together    | 0.02  | 0.57  | ns     |
|           | Physical activity walking together    | 0.03  | 0.86  | ns     |
|           | Physical activity together in car     | 0.03  | 0.85  | ns     |
|           | Physical activity attitude            | 0.20  | 4.96  | <0.001 |
|           | Physical activity modeling            | 0.06  | 1.59  | ns     |
|           | Physical activity together            | 0.07  | 1.96  | ns     |
|           | Physical activity logistic support    | 0.19  | 5.08  | <0.001 |
|           | Physical activity encouragement       | 0.25  | 6.92  | <0.001 |
|           | Physical activity fitness benefit     | 0.06  | 1.48  | ns     |
|           | Physical activity competition benefit | 0.04  | 1.11  | ns     |
|           | Physical activity social benefit      | 0.05  | 1.21  | ns     |
|           | Physical activity relaxing benefit    | 0.21  | 5.61  | <0.001 |
|           | Physical activity fun benefit         | 0.09  | 2.40  | 0.02   |
|           | Physical activity barriers            | 0.03  | 0.80  | ns     |
|           | <b>SCHOOL ENVIRONMENT:</b>            |       |       |        |
|           | <i>Physical</i>                       |       |       |        |
|           | Activity in playtime                  | 0.10  | 2.75  | 0.006  |
|           | Extra-curricular sports               | 0.03  | 0.85  | ns     |
|           | Participation extra-curricular sports | 0.14  | 3.85  | <0.001 |
|           | <i>Sociocultural</i>                  |       |       |        |
|           | Relation classmates                   | -0.03 | -0.83 | ns     |
|           | Schoolwork stress                     | -0.02 | -0.47 | ns     |
|           | Good student according to teacher?    | 0.06  | 1.50  | ns     |
|           | <i>Political</i>                      |       |       |        |
|           | Homework                              | 0.04  | 0.94  | ns     |
|           | Hours of physical education           | 0.10  | 2.80  | 0.005  |
